# Supplementary material
Source: PubMed Central journal article supplement (PMC1373753)
Supplement: cmaj_174_4_481__1.pdf [file cmaj_174_4_481__1.pdf]

**Appendix 1:** Empirical evidence of sources of bias reported in 3 systematic review of diagnostic accuracy studies

| Checkpoint                                                                                                                  | Review; sources of bias                                                                                                                                                                                                                 |                                                                                                                                                                                                                  |                                                                                                                                                                                                                                 |
|-----------------------------------------------------------------------------------------------------------------------------|-----------------------------------------------------------------------------------------------------------------------------------------------------------------------------------------------------------------------------------------|------------------------------------------------------------------------------------------------------------------------------------------------------------------------------------------------------------------|---------------------------------------------------------------------------------------------------------------------------------------------------------------------------------------------------------------------------------|
|                                                                                                                             | Lijmer et al <sup>5</sup>                                                                                                                                                                                                               | Whiting et al <sup>6</sup>                                                                                                                                                                                       | Rutjes et al <sup>4</sup>                                                                                                                                                                                                       |
| Was the diagnostic test evaluated in a representative spectrum of patients?                                                 | <ul style="list-style-type: none"> <li>Case-control design (RDOR 3.0, 95% CI 2.0–4.5)</li> <li>Nonconsecutive patient selection (RDOR 0.9, 95% CI 0.7–1.1)</li> <li>Retrospective data collection (RDOR 1.0, 95% CI 0.7–1.4)</li> </ul> | <ul style="list-style-type: none"> <li>Distorted selection of participants (some empirical support)</li> <li>—</li> <li>—</li> </ul>                                                                             | <ul style="list-style-type: none"> <li>Case-control design (RDOR 4.9, 95% CI 0.6–37.3)</li> <li>Nonconsecutive sampling (RDOR 1.5, 95% CI 1.0–2.1)</li> <li>Retrospective data collection (RDOR 1.6, 95% CI 1.1–2.2)</li> </ul> |
| Did investigators compare the test against an appropriate, independent “gold” (reference) standard?                         | —                                                                                                                                                                                                                                       | <ul style="list-style-type: none"> <li>Inappropriate reference standard (some empirical support)</li> <li>Incorporation bias (test used as part of gold standard) (no empirical support)</li> </ul>              | —                                                                                                                                                                                                                               |
| Did investigators perform the same gold standard on all patients regardless of the results of the test under investigation? | <ul style="list-style-type: none"> <li>Different reference standard used for some patients (RDOR 2.2, 95% CI 1.5–3.3)</li> <li>Reference standard not used for some patients (RDOR 1.0, 95% CI 0.8–1.3)</li> </ul>                      | <ul style="list-style-type: none"> <li>Different reference standard used for some patients (some empirical support)</li> <li>Reference standard not used for some patients (strong empirical support)</li> </ul> | <ul style="list-style-type: none"> <li>Different reference standard used for some patients (RDOR 1.6, 95% CI 0.9–2.9)</li> <li>Reference standard not used for some patients (RDOR 1.1, 95% CI 0.7–1.7)</li> </ul>              |
| Did investigators interpret the results of the study test and the gold standard independently and blindly from each other?  | <ul style="list-style-type: none"> <li>Nonblinded reading of results (RDOR 1.3, 95% CI 1.0–1.9)</li> </ul>                                                                                                                              | <ul style="list-style-type: none"> <li>Review bias (some empirical support)</li> </ul>                                                                                                                           | <ul style="list-style-type: none"> <li>Single- or nonblinded reading of results (RDOR 1.1, 95% CI 0.8–1.6)</li> </ul>                                                                                                           |

Note: RDOR = relative diagnostic odds ratio, CI = confidence interval.
